# Supplementary material for: 21st century marine climate projections for the NW European Shelf Seas based on a Perturbed Parameter Ensemble
Source: Copernicus journal article supplement (doi:10.5194/egusphere-2023-1816), 2023-08-18
Supplement: Supplementary file 1 [file egusphere-2023-1816-supplement.pdf]

## Supplement

### 1.1 Additional Tables

Table S1 Monthly Mean 2 dimensional files that were not archived, and how they were replaced: “Daily Means” the daily mean files were archived, and have been averaged into monthly means.

| Ensemble Member | Date   | Grid | Replacement averaged from |
|-----------------|--------|------|---------------------------|
| r001i1p00605    | 205107 | T    | Daily Means               |
| r001i1p00605    | 205008 | U    | Daily Means               |
| r001i1p00605    | 208403 | V    | Daily Means               |
| r001i1p00834    | 205102 | T    | Daily Means               |
| r001i1p00834    | 205103 | T    | Daily Means               |
| r001i1p01113    | 208409 | V    | Daily Means               |
| r001i1p01935    | 205110 | T    | Daily Means               |
| r001i1p02123    | 205010 | U    | Daily Means               |
| r001i1p02123    | 208311 | V    | Daily Means               |
| r001i1p02242    | 205105 | U    | <b>Adjacent Years</b>     |
| r001i1p02242    | 208311 | U    | Daily Means               |
| r001i1p02335    | 205009 | T    | Daily Means               |
| r001i1p02868    | 205111 | T    | <b>Adjacent Years</b>     |
| r001i1p02868    | 205112 | T    | Daily Means               |
| r001i1p02868    | 205108 | U    | Daily Means               |
| r001i1p02868    | 205006 | V    | Daily Means               |

**Table S2 Regional Mean monthly mean files not archived**

| <b>Ensemble Member</b> | <b>Date</b> | <b>Replacement averaged from</b> |
|------------------------|-------------|----------------------------------|
| <b>r001i1p00605</b>    | 205008      | Daily Means                      |
| <b>r001i1p00834</b>    | 205109      | Daily Means                      |
| <b>r001i1p01935</b>    | 202905      | Daily Means                      |
| <b>r001i1p01935</b>    | 202906      | Daily Means                      |
| <b>r001i1p02123</b>    | 205010      | Daily Means                      |
| <b>r001i1p02491</b>    | 205008      | Daily Means                      |
| <b>r001i1p02832</b>    | 205006      | <b>Adjacent Years</b>            |

**Table S3 MLD for summer and autumn. Note the grid boxes where the PEA < 20 J/m<sup>3</sup> have been masked out prior to calculation of the regional statistics.**

| <b>MLD</b> | <b>Shelf</b>                | <b>Southern<br/>North<br/>Sea</b> | <b>Central<br/>North<br/>Sea</b> | <b>Northern<br/>North<br/>Sea</b> | <b>English<br/>Channel</b> | <b>Irish<br/>Sea</b>    | <b>Celtic<br/>Sea</b>   |
|------------|-----------------------------|-----------------------------------|----------------------------------|-----------------------------------|----------------------------|-------------------------|-------------------------|
| <b>JJA</b> | -3.33 m<br>(±2.17<br>m)     | -2.78 m<br>(±1.65 m)              | -2.17 m<br>(±1.55<br>m)          | -2.01 m<br>(±2.01 m)              | -4.13 m<br>(±2.67<br>m)    | -6.03 m<br>(±3.57<br>m) | -3.00 m<br>(±1.40<br>m) |
| <b>SON</b> | -12.30<br>m<br>(±6.69<br>m) | -0.11 m<br>(±0.86 m)              | -7.19 m<br>(±3.82<br>m)          | -8.23 m<br>(±6.26 m)              | 0.31 m<br>(±0.24<br>m)     | -9.39 m<br>(±8.65<br>m) | -9.55 m<br>(±4.50<br>m) |

**Table S4 Projected regional mean Potential Energy Anomaly (PEA) changes between 2000-2019 and 2079-2098. 10 J/m<sup>3</sup> is considered the threshold for stratification. See Table 5 for details.**

| <b>PEA</b> |                                                            |                                                           |                                                           |                                                            |                                                           |                                                           |                                                            |
|------------|------------------------------------------------------------|-----------------------------------------------------------|-----------------------------------------------------------|------------------------------------------------------------|-----------------------------------------------------------|-----------------------------------------------------------|------------------------------------------------------------|
|            | Shelf                                                      | Southern<br>North<br>Sea                                  | Central<br>North<br>Sea                                   | Northern<br>North<br>Sea                                   | English<br>Channel                                        | Irish Sea                                                 | Celtic<br>Sea                                              |
| <b>ANN</b> | 17.41<br>J/m <sup>3</sup><br>(±13.40<br>J/m <sup>3</sup> ) | 0.57 J/m <sup>3</sup><br>(±0.63<br>J/m <sup>3</sup> )     | 10.02<br>J/m <sup>3</sup><br>(±4.49<br>J/m <sup>3</sup> ) | 14.87<br>J/m <sup>3</sup><br>(±13.50<br>J/m <sup>3</sup> ) | 1.75<br>J/m <sup>3</sup><br>(±0.81<br>J/m <sup>3</sup> )  | 3.89<br>J/m <sup>3</sup><br>(±2.18<br>J/m <sup>3</sup> )  | 36.25<br>J/m <sup>3</sup><br>(±25.67<br>J/m <sup>3</sup> ) |
| <b>DJF</b> | 8.52<br>J/m <sup>3</sup><br>(±9.99<br>J/m <sup>3</sup> )   | -0.17<br>J/m <sup>3</sup><br>(±0.42<br>J/m <sup>3</sup> ) | 0.02<br>J/m <sup>3</sup><br>(±0.44<br>J/m <sup>3</sup> )  | 4.25 J/m <sup>3</sup><br>(±9.01<br>J/m <sup>3</sup> )      | -0.03<br>J/m <sup>3</sup><br>(±0.18<br>J/m <sup>3</sup> ) | -0.08<br>J/m <sup>3</sup><br>(±0.98<br>J/m <sup>3</sup> ) | 27.87<br>J/m <sup>3</sup><br>(±23.69<br>J/m <sup>3</sup> ) |
| <b>MAM</b> | 4.06<br>J/m <sup>3</sup><br>(±8.53<br>J/m <sup>3</sup> )   | 0.22 J/m <sup>3</sup><br>(±0.97<br>J/m <sup>3</sup> )     | 1.69<br>J/m <sup>3</sup><br>(±2.56<br>J/m <sup>3</sup> )  | 3.49 J/m <sup>3</sup><br>(±8.66<br>J/m <sup>3</sup> )      | 0.40<br>J/m <sup>3</sup><br>(±0.48<br>J/m <sup>3</sup> )  | 1.33<br>J/m <sup>3</sup><br>(±1.96<br>J/m <sup>3</sup> )  | 10.53<br>J/m <sup>3</sup><br>(±17.87<br>J/m <sup>3</sup> ) |
| <b>JJA</b> | 24.03<br>J/m <sup>3</sup><br>(±17.14<br>J/m <sup>3</sup> ) | 2.03 J/m <sup>3</sup><br>(±1.55<br>J/m <sup>3</sup> )     | 21.57<br>J/m <sup>3</sup><br>(±8.78<br>J/m <sup>3</sup> ) | 22.71<br>J/m <sup>3</sup><br>(±18.74<br>J/m <sup>3</sup> ) | 4.03<br>J/m <sup>3</sup><br>(±1.58<br>J/m <sup>3</sup> )  | 10.11<br>J/m <sup>3</sup><br>(±4.56<br>J/m <sup>3</sup> ) | 41.12<br>J/m <sup>3</sup><br>(±28.00<br>J/m <sup>3</sup> ) |
| <b>SON</b> | 32.84<br>J/m <sup>3</sup><br>(±21.40<br>J/m <sup>3</sup> ) | 0.22 J/m <sup>3</sup><br>(±0.50<br>J/m <sup>3</sup> )     | 16.77<br>J/m <sup>3</sup><br>(±8.91<br>J/m <sup>3</sup> ) | 28.98<br>J/m <sup>3</sup><br>(±23.80<br>J/m <sup>3</sup> ) | 2.60<br>J/m <sup>3</sup><br>(±1.44<br>J/m <sup>3</sup> )  | 4.21<br>J/m <sup>3</sup><br>(±3.02<br>J/m <sup>3</sup> )  | 64.99<br>J/m <sup>3</sup><br>(±37.43<br>J/m <sup>3</sup> ) |

**Table S5 Projected regional mean Potential Energy Anomaly (temperature component, PEAT) changes between 2000-2019 and 2079-2098. 10 J/m<sup>3</sup> is considered the threshold for stratification. See Table 5 for details.**

| <b>PEAT</b> | <b>Shelf</b>                                               | <b>Southern<br/>North<br/>Sea</b>                     | <b>Central<br/>North<br/>Sea</b>                          | <b>Northern<br/>North<br/>Sea</b>                          | <b>English<br/>Channel</b>                                | <b>Irish<br/>Sea</b>                                     | <b>Celtic<br/>Sea</b>                                      |
|-------------|------------------------------------------------------------|-------------------------------------------------------|-----------------------------------------------------------|------------------------------------------------------------|-----------------------------------------------------------|----------------------------------------------------------|------------------------------------------------------------|
| <b>ANN</b>  | 9.81<br>J/m <sup>3</sup><br>(±5.80<br>J/m <sup>3</sup> )   | 0.44 J/m <sup>3</sup><br>(±0.25<br>J/m <sup>3</sup> ) | 10.44<br>J/m <sup>3</sup><br>(±3.67<br>J/m <sup>3</sup> ) | 15.80<br>J/m <sup>3</sup><br>(±5.89<br>J/m <sup>3</sup> )  | 1.87<br>J/m <sup>3</sup><br>(±0.71<br>J/m <sup>3</sup> )  | 3.37<br>J/m <sup>3</sup><br>(±1.45<br>J/m <sup>3</sup> ) | 14.88<br>J/m <sup>3</sup><br>(±9.48<br>J/m <sup>3</sup> )  |
| <b>DJF</b>  | -0.36<br>J/m <sup>3</sup><br>(±4.01<br>J/m <sup>3</sup> )  | 0.00 J/m <sup>3</sup><br>(±0.05<br>J/m <sup>3</sup> ) | 0.20<br>J/m <sup>3</sup><br>(±0.25<br>J/m <sup>3</sup> )  | 2.28 J/m <sup>3</sup><br>(±3.05<br>J/m <sup>3</sup> )      | -0.00<br>J/m <sup>3</sup><br>(±0.05<br>J/m <sup>3</sup> ) | 0.08<br>J/m <sup>3</sup><br>(±0.30<br>J/m <sup>3</sup> ) | 1.30<br>J/m <sup>3</sup><br>(±7.15<br>J/m <sup>3</sup> )   |
| <b>MAM</b>  | -0.85<br>J/m <sup>3</sup><br>(±5.26<br>J/m <sup>3</sup> )  | 0.17 J/m <sup>3</sup><br>(±0.15<br>J/m <sup>3</sup> ) | 2.06<br>J/m <sup>3</sup><br>(±1.62<br>J/m <sup>3</sup> )  | 2.21 J/m <sup>3</sup><br>(±3.65<br>J/m <sup>3</sup> )      | 0.40<br>J/m <sup>3</sup><br>(±0.31<br>J/m <sup>3</sup> )  | 1.02<br>J/m <sup>3</sup><br>(±0.74<br>J/m <sup>3</sup> ) | -3.71<br>J/m <sup>3</sup><br>(±10.18<br>J/m <sup>3</sup> ) |
| <b>JJA</b>  | 17.36<br>J/m <sup>3</sup><br>(±8.34<br>J/m <sup>3</sup> )  | 1.47 J/m <sup>3</sup><br>(±0.80<br>J/m <sup>3</sup> ) | 21.84<br>J/m <sup>3</sup><br>(±6.95<br>J/m <sup>3</sup> ) | 25.97<br>J/m <sup>3</sup><br>(±8.84<br>J/m <sup>3</sup> )  | 4.28<br>J/m <sup>3</sup><br>(±1.42<br>J/m <sup>3</sup> )  | 8.97<br>J/m <sup>3</sup><br>(±3.49<br>J/m <sup>3</sup> ) | 22.45<br>J/m <sup>3</sup><br>(±11.74<br>J/m <sup>3</sup> ) |
| <b>SON</b>  | 23.06<br>J/m <sup>3</sup><br>(±10.25<br>J/m <sup>3</sup> ) | 0.13 J/m <sup>3</sup><br>(±0.17<br>J/m <sup>3</sup> ) | 17.63<br>J/m <sup>3</sup><br>(±7.64<br>J/m <sup>3</sup> ) | 32.65<br>J/m <sup>3</sup><br>(±13.47<br>J/m <sup>3</sup> ) | 2.82<br>J/m <sup>3</sup><br>(±1.41<br>J/m <sup>3</sup> )  | 3.39<br>J/m <sup>3</sup><br>(±2.17<br>J/m <sup>3</sup> ) | 39.45<br>J/m <sup>3</sup><br>(±14.86<br>J/m <sup>3</sup> ) |

**Table S6 Projected regional mean Potential Energy Anomaly (salinity component, PEAS) changes between 2000-2019 and 2079-2098. 10 J/m<sup>3</sup> is considered the threshold for stratification. See Table 5 for details.**

| <b>PEAS</b> | <b>Shelf</b>                                              | <b>Southern<br/>North<br/>Sea</b>                         | <b>Central<br/>North<br/>Sea</b>                          | <b>Northern<br/>North<br/>Sea</b>                          | <b>English<br/>Channel</b>                                | <b>Irish<br/>Sea</b>                                      | <b>Celtic<br/>Sea</b>                                      |
|-------------|-----------------------------------------------------------|-----------------------------------------------------------|-----------------------------------------------------------|------------------------------------------------------------|-----------------------------------------------------------|-----------------------------------------------------------|------------------------------------------------------------|
| <b>ANN</b>  | 7.60<br>J/m <sup>3</sup><br>(±13.53<br>J/m <sup>3</sup> ) | 0.13 J/m <sup>3</sup><br>(±0.44<br>J/m <sup>3</sup> )     | -0.42<br>J/m <sup>3</sup><br>(±1.86<br>J/m <sup>3</sup> ) | -0.92<br>J/m <sup>3</sup><br>(±10.67<br>J/m <sup>3</sup> ) | -0.12<br>J/m <sup>3</sup><br>(±0.19<br>J/m <sup>3</sup> ) | 0.52<br>J/m <sup>3</sup><br>(±1.29<br>J/m <sup>3</sup> )  | 21.37<br>J/m <sup>3</sup><br>(±28.61<br>J/m <sup>3</sup> ) |
| <b>DJF</b>  | 8.87<br>J/m <sup>3</sup><br>(±12.61<br>J/m <sup>3</sup> ) | -0.17<br>J/m <sup>3</sup><br>(±0.46<br>J/m <sup>3</sup> ) | -0.18<br>J/m <sup>3</sup><br>(±0.41<br>J/m <sup>3</sup> ) | 1.97 J/m <sup>3</sup><br>(±8.82<br>J/m <sup>3</sup> )      | -0.03<br>J/m <sup>3</sup><br>(±0.18<br>J/m <sup>3</sup> ) | -0.15<br>J/m <sup>3</sup><br>(±1.20<br>J/m <sup>3</sup> ) | 26.57<br>J/m <sup>3</sup><br>(±28.34<br>J/m <sup>3</sup> ) |
| <b>MAM</b>  | 4.91<br>J/m <sup>3</sup><br>(±11.80<br>J/m <sup>3</sup> ) | 0.05 J/m <sup>3</sup><br>(±0.86<br>J/m <sup>3</sup> )     | -0.37<br>J/m <sup>3</sup><br>(±1.48<br>J/m <sup>3</sup> ) | 1.29 J/m <sup>3</sup><br>(±9.67<br>J/m <sup>3</sup> )      | 0.00<br>J/m <sup>3</sup><br>(±0.26<br>J/m <sup>3</sup> )  | 0.31<br>J/m <sup>3</sup><br>(±1.49<br>J/m <sup>3</sup> )  | 14.24<br>J/m <sup>3</sup><br>(±25.19<br>J/m <sup>3</sup> ) |
| <b>JJA</b>  | 6.68<br>J/m <sup>3</sup><br>(±15.98<br>J/m <sup>3</sup> ) | 0.56 J/m <sup>3</sup><br>(±0.88<br>J/m <sup>3</sup> )     | -0.27<br>J/m <sup>3</sup><br>(±3.97<br>J/m <sup>3</sup> ) | -3.26<br>J/m <sup>3</sup><br>(±14.69<br>J/m <sup>3</sup> ) | -0.25<br>J/m <sup>3</sup><br>(±0.34<br>J/m <sup>3</sup> ) | 1.13<br>J/m <sup>3</sup><br>(±1.89<br>J/m <sup>3</sup> )  | 18.67<br>J/m <sup>3</sup><br>(±29.97<br>J/m <sup>3</sup> ) |
| <b>SON</b>  | 9.78<br>J/m <sup>3</sup><br>(±16.19<br>J/m <sup>3</sup> ) | 0.09 J/m <sup>3</sup><br>(±0.42<br>J/m <sup>3</sup> )     | -0.86<br>J/m <sup>3</sup><br>(±3.17<br>J/m <sup>3</sup> ) | -3.67<br>J/m <sup>3</sup><br>(±14.30<br>J/m <sup>3</sup> ) | -0.22<br>J/m <sup>3</sup><br>(±0.19<br>J/m <sup>3</sup> ) | 0.81<br>J/m <sup>3</sup><br>(±1.85<br>J/m <sup>3</sup> )  | 25.54<br>J/m <sup>3</sup><br>(±34.15<br>J/m <sup>3</sup> ) |

**Table S7 Projected regional mean DFS changes between 2000-2019 and 2079-2098. See Table 5 for details.**

| <b>DFS</b> | <b>Shelf</b>                   | <b>Southern<br/>North<br/>Sea</b> | <b>Central<br/>North<br/>Sea</b> | <b>Northern<br/>North<br/>Sea</b> | <b>English<br/>Channel</b>     | <b>Irish<br/>Sea</b>           | <b>Celtic<br/>Sea</b>          |
|------------|--------------------------------|-----------------------------------|----------------------------------|-----------------------------------|--------------------------------|--------------------------------|--------------------------------|
| <b>ANN</b> | -0.06<br>psu<br>(±0.15<br>psu) | -0.01 psu<br>(±0.03<br>psu)       | 0.01 psu<br>(±0.05<br>psu)       | 0.02 psu<br>(±0.15<br>psu)        | 0.00 psu<br>(±0.01<br>psu)     | -0.01<br>psu<br>(±0.03<br>psu) | -0.16<br>psu<br>(±0.25<br>psu) |
| <b>DJF</b> | -0.07<br>psu<br>(±0.13<br>psu) | 0.02 psu<br>(±0.03<br>psu)        | 0.01 psu<br>(±0.01<br>psu)       | -0.00 psu<br>(±0.10<br>psu)       | 0.00 psu<br>(±0.01<br>psu)     | 0.01 psu<br>(±0.02<br>psu)     | -0.22<br>psu<br>(±0.24<br>psu) |
| <b>MAM</b> | -0.04<br>psu<br>(±0.13<br>psu) | -0.00 psu<br>(±0.05<br>psu)       | 0.01 psu<br>(±0.04<br>psu)       | 0.00 psu<br>(±0.14<br>psu)        | -0.00<br>psu<br>(±0.02<br>psu) | -0.01<br>psu<br>(±0.03<br>psu) | -0.12<br>psu<br>(±0.22<br>psu) |
| <b>JJA</b> | -0.05<br>psu<br>(±0.21<br>psu) | -0.04 psu<br>(±0.05<br>psu)       | 0.00 psu<br>(±0.11<br>psu)       | 0.06 psu<br>(±0.28<br>psu)        | 0.01 psu<br>(±0.01<br>psu)     | -0.02<br>psu<br>(±0.05<br>psu) | -0.12<br>psu<br>(±0.28<br>psu) |
| <b>SON</b> | -0.08<br>psu<br>(±0.18<br>psu) | -0.01 psu<br>(±0.03<br>psu)       | 0.02 psu<br>(±0.07<br>psu)       | 0.04 psu<br>(±0.19<br>psu)        | 0.01 psu<br>(±0.01<br>psu)     | -0.02<br>psu<br>(±0.03<br>psu) | -0.20<br>psu<br>(±0.32<br>psu) |

**Table S8 Projected regional mean NBS changes between 2000-2019 and 2079-2098. See Table 5 for details.**

| <b>NBS</b> | <b>Shelf</b>                   | <b>Southern<br/>North<br/>Sea</b> | <b>Central<br/>North<br/>Sea</b> | <b>Northern<br/>North<br/>Sea</b> | <b>English<br/>Channel</b>     | <b>Irish<br/>Sea</b>           | <b>Celtic<br/>Sea</b>          |
|------------|--------------------------------|-----------------------------------|----------------------------------|-----------------------------------|--------------------------------|--------------------------------|--------------------------------|
| <b>ANN</b> | -0.95<br>psu<br>(±0.82<br>psu) | -0.93 psu<br>(±1.00<br>psu)       | -0.98<br>psu<br>(±0.92<br>psu)   | -1.08 psu<br>(±0.96<br>psu)       | -0.82<br>psu<br>(±0.80<br>psu) | -0.97<br>psu<br>(±0.76<br>psu) | -0.80<br>psu<br>(±0.58<br>psu) |
| <b>DJF</b> | -0.93<br>psu<br>(±0.82<br>psu) | -0.92 psu<br>(±1.01<br>psu)       | -0.96<br>psu<br>(±0.91<br>psu)   | -1.05 psu<br>(±0.95<br>psu)       | -0.80<br>psu<br>(±0.78<br>psu) | -0.97<br>psu<br>(±0.78<br>psu) | -0.76<br>psu<br>(±0.58<br>psu) |
| <b>MAM</b> | -0.98<br>psu<br>(±0.83<br>psu) | -0.94 psu<br>(±1.01<br>psu)       | -1.00<br>psu<br>(±0.92<br>psu)   | -1.09 psu<br>(±0.95<br>psu)       | -0.83<br>psu<br>(±0.78<br>psu) | -1.01<br>psu<br>(±0.78<br>psu) | -0.85<br>psu<br>(±0.61<br>psu) |
| <b>JJA</b> | -0.95<br>psu<br>(±0.82<br>psu) | -0.92 psu<br>(±1.01<br>psu)       | -0.97<br>psu<br>(±0.92<br>psu)   | -1.08 psu<br>(±0.95<br>psu)       | -0.82<br>psu<br>(±0.81<br>psu) | -0.98<br>psu<br>(±0.77<br>psu) | -0.82<br>psu<br>(±0.59<br>psu) |
| <b>SON</b> | -0.93<br>psu<br>(±0.82<br>psu) | -0.93 psu<br>(±1.00<br>psu)       | -0.97<br>psu<br>(±0.92<br>psu)   | -1.09 psu<br>(±0.97<br>psu)       | -0.81<br>psu<br>(±0.82<br>psu) | -0.90<br>psu<br>(±0.75<br>psu) | -0.78<br>psu<br>(±0.57<br>psu) |



Table S9 Change in AMOC between 2000-2019 and 2079-2098.

| <b>Ensemble member</b> | <b>Early century (2000-2019) AMOC.</b> | <b>Late century (2079-2098) AMOC.</b> | <b>Change in AMOC between early century (2000-2019) and late century (2079-2098)</b> |
|------------------------|----------------------------------------|---------------------------------------|--------------------------------------------------------------------------------------|
| <b>r001i1p00000</b>    | 13.876                                 | 6.647                                 | -7.229                                                                               |
| <b>r001i1p00605</b>    | 16.888                                 | 7.965                                 | -8.923                                                                               |
| <b>r001i1p00834</b>    | 18.039                                 | 7.933                                 | -10.106                                                                              |
| <b>r001i1p01113</b>    | 13.147                                 | 6.708                                 | -6.439                                                                               |
| <b>r001i1p01554</b>    | 15.008                                 | 6.541                                 | -8.466                                                                               |
| <b>r001i1p01649</b>    | 16.892                                 | 8.825                                 | -8.067                                                                               |
| <b>r001i1p01843</b>    | 17.646                                 | 8.165                                 | -9.481                                                                               |
| <b>r001i1p01935</b>    | 17.909                                 | 10.578                                | -7.331                                                                               |
| <b>r001i1p02123</b>    | 17.814                                 | 8.235                                 | -9.579                                                                               |
| <b>r001i1p02242</b>    | 17.259                                 | 8.666                                 | -8.593                                                                               |
| <b>r001i1p02491</b>    | 16.752                                 | 7.145                                 | -9.607                                                                               |
| <b>r001i1p02868</b>    | 13.445                                 | 6.644                                 | -6.800                                                                               |

## 1.2 Additional Figures

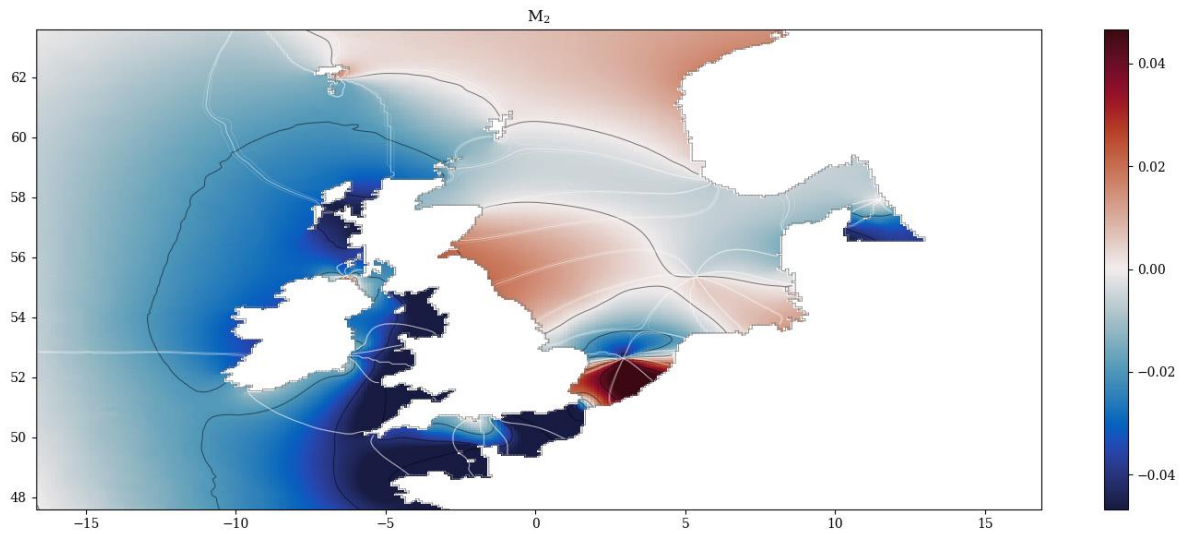

**Figure S1** The impact of the Tide Generating Potential on the M<sub>2</sub> co-tidal chart. The difference between the tidal harmonic analysis of the simulation with the Tide Generating Potential and the unperturbed member of the PPE, the equivalent simulation with the Tide Generating Potential off. The amplitude (m) is shown with colour map (and black contours which match the tick labels of the colourbar). The phase every 45° is shown as fine white contours, for the two simulations, and the average phase of the two simulations is a bolder white line

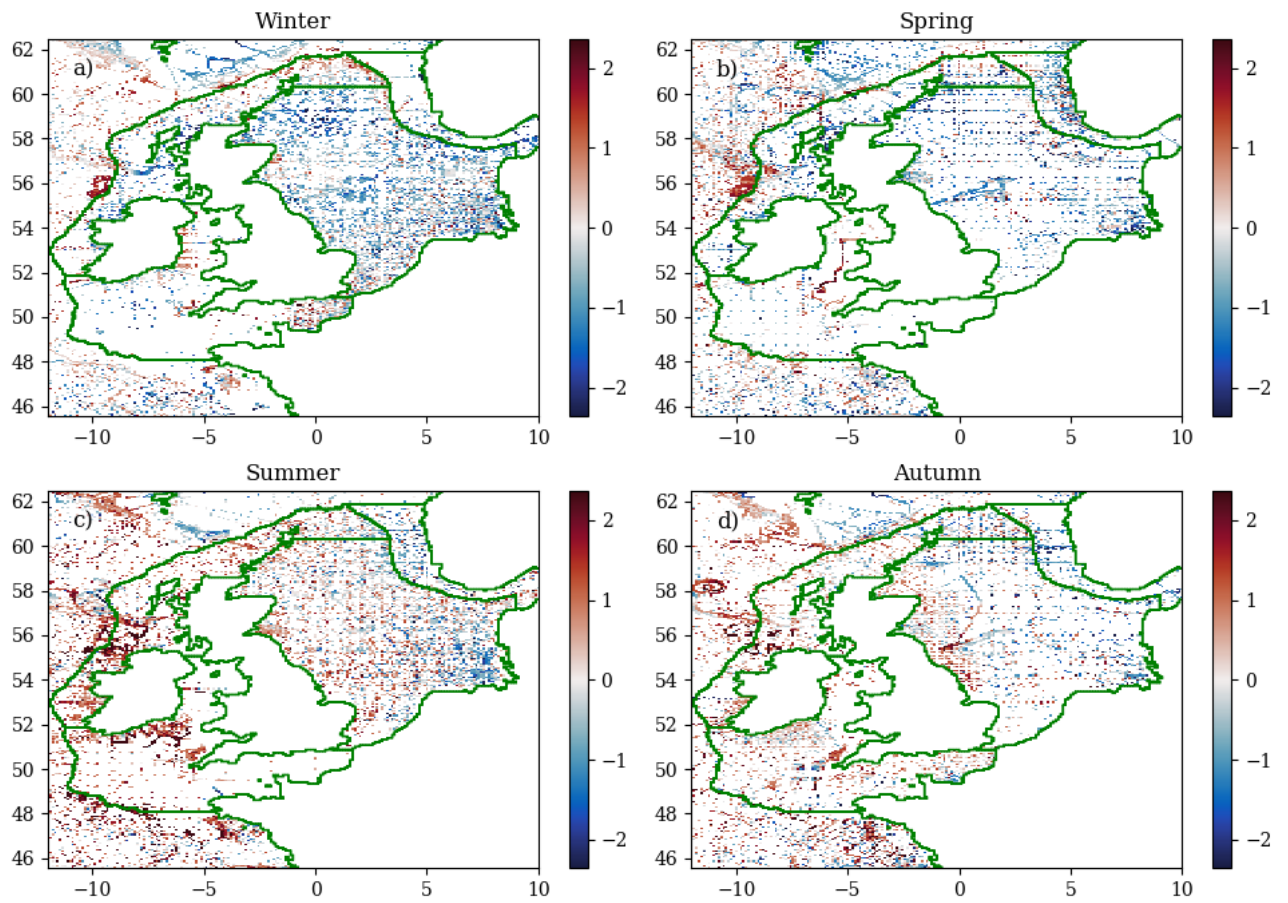

**Figure S2** Model-EN4 biases normalised by the ensemble standard deviation for the four season (a-d) – effectively the number of ensemble standard deviations the observations are from the ensemble mean. See text for details.

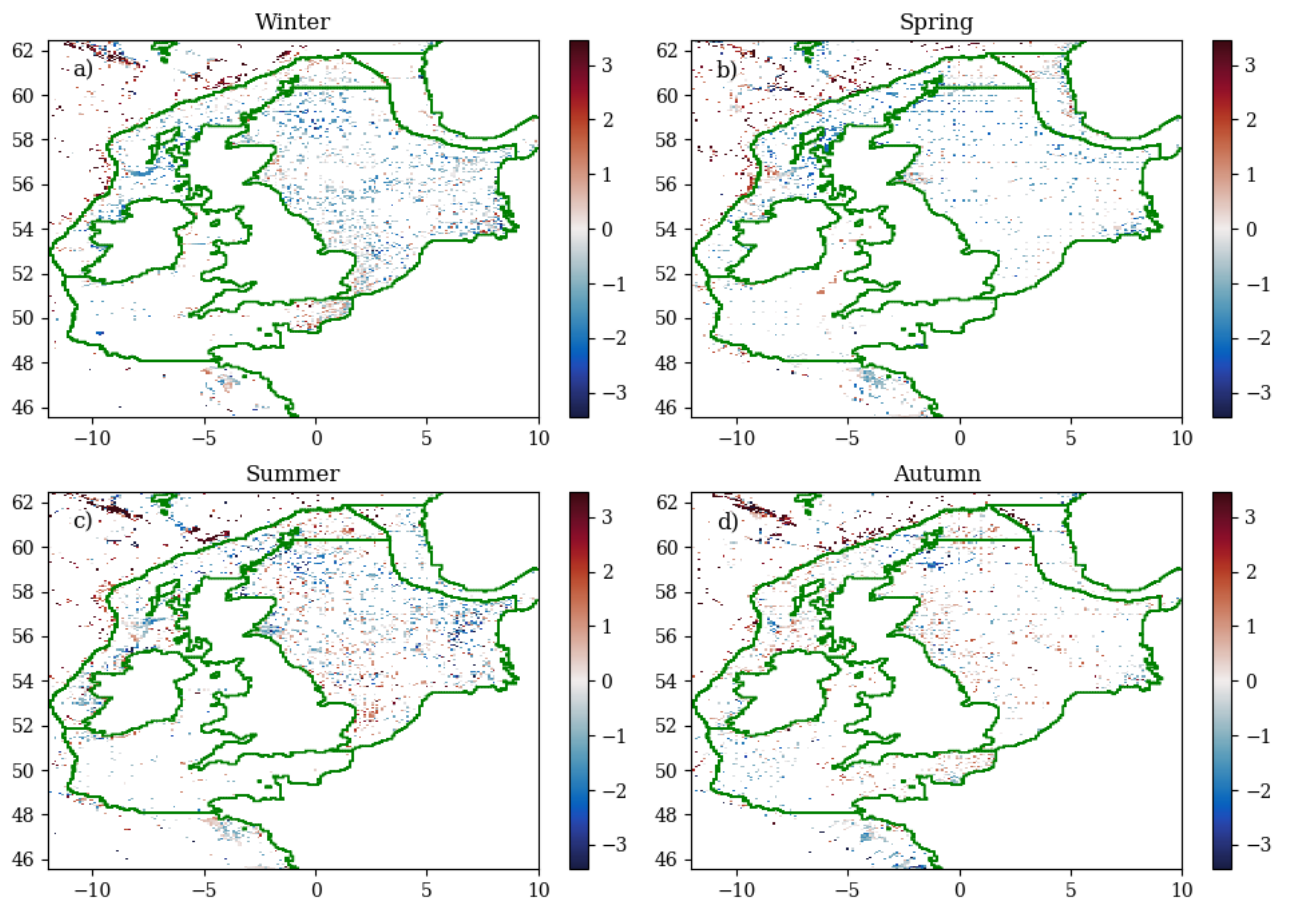

Figure S3 as Figure S2 but for NBT

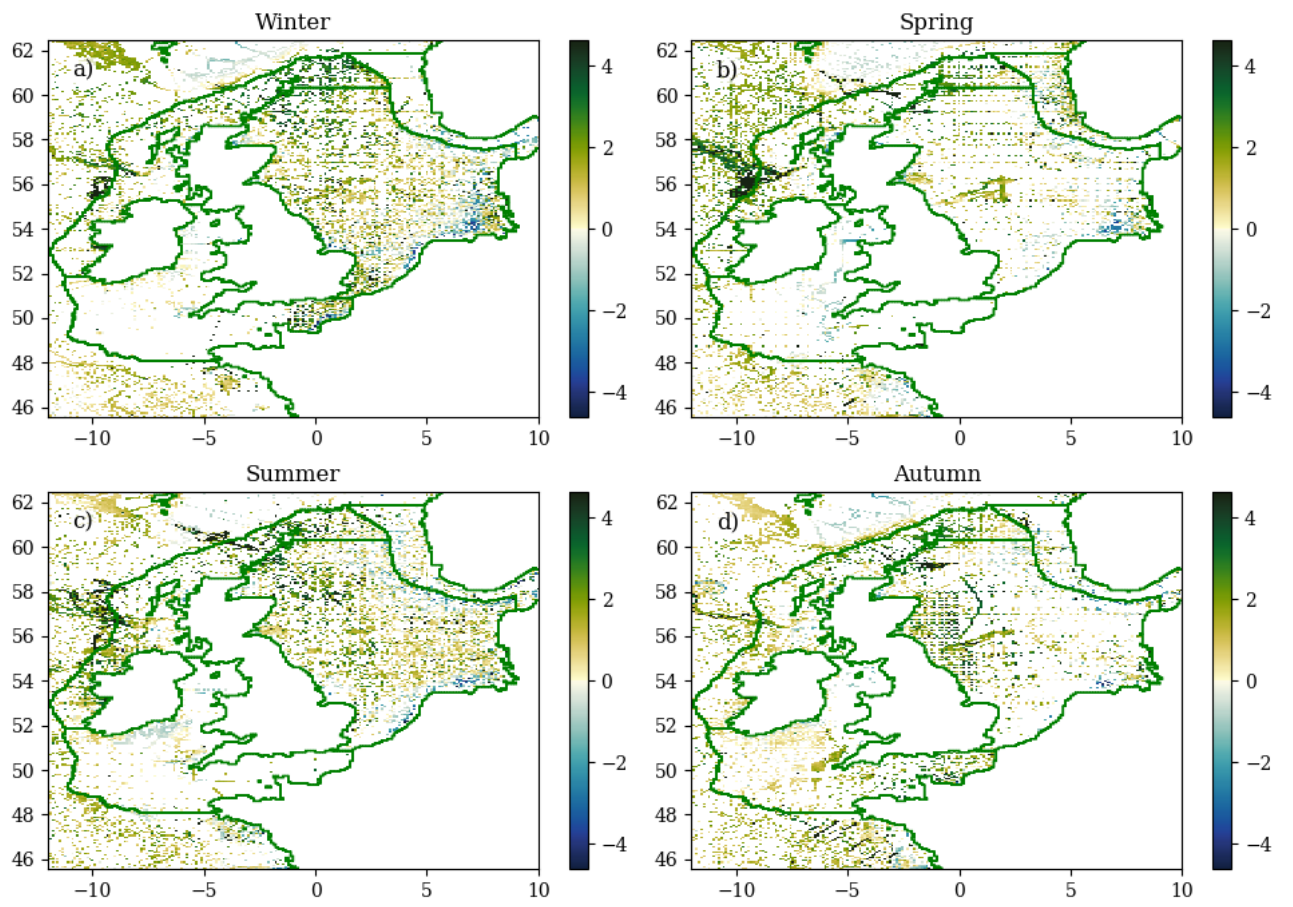

Figure S4 as Figure S2 but for SSS.

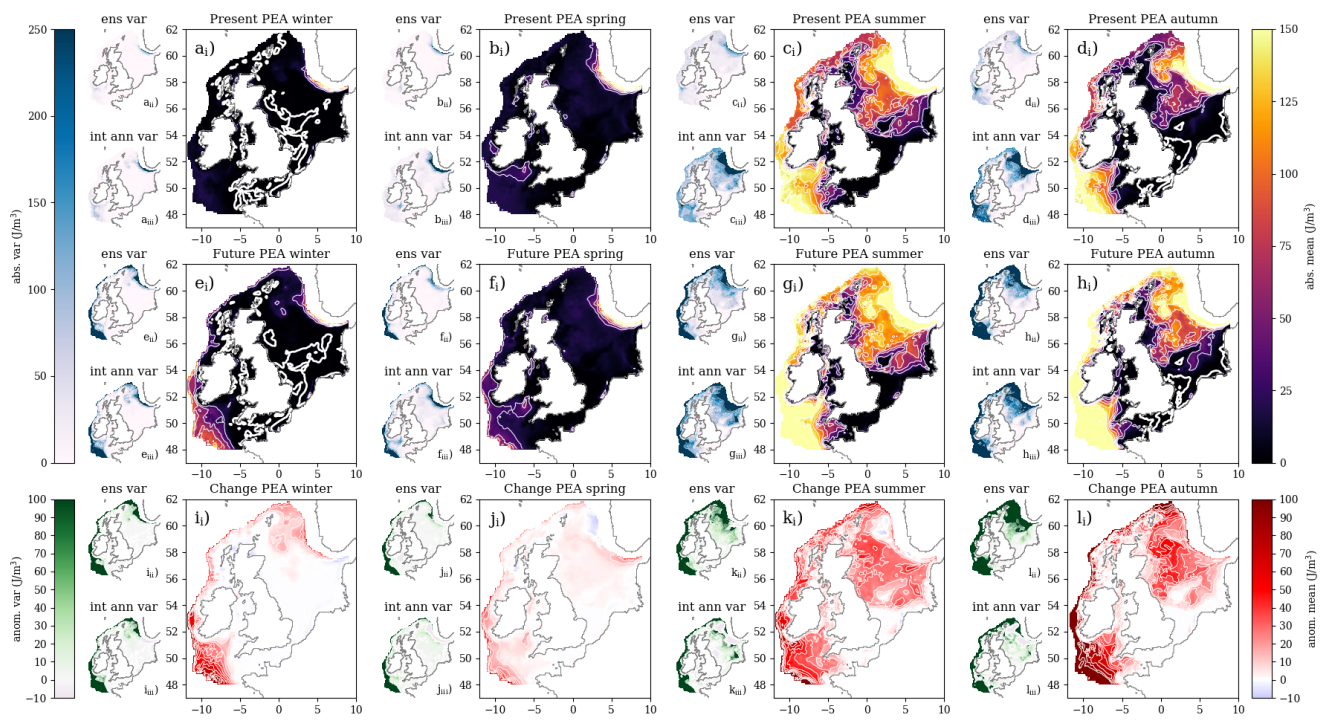

Figure S5 as Figure 6 but for Potential Energy Anomaly (PEA), a measure of stratification, where  $>10 \text{ J m}^{-3}$  is considered stratified).

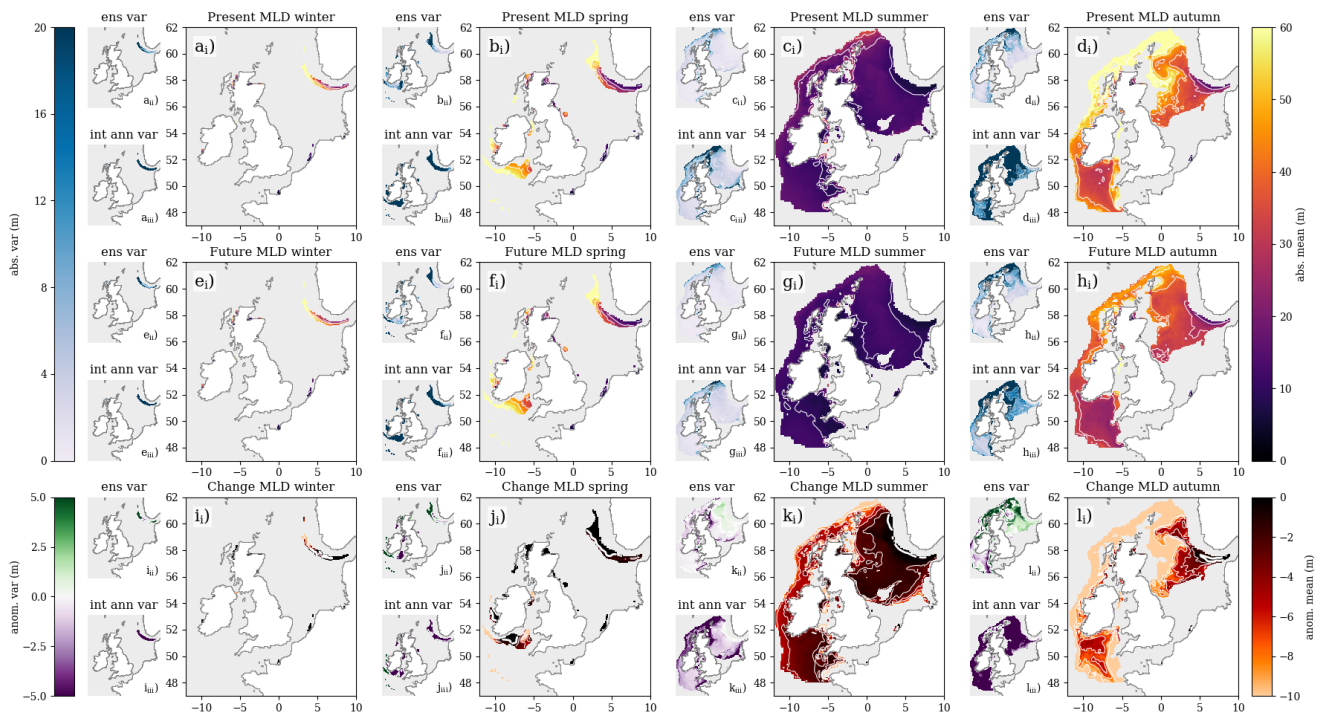

Figure S6 as Figure 6, but for the Mixed Layer Depth (m).

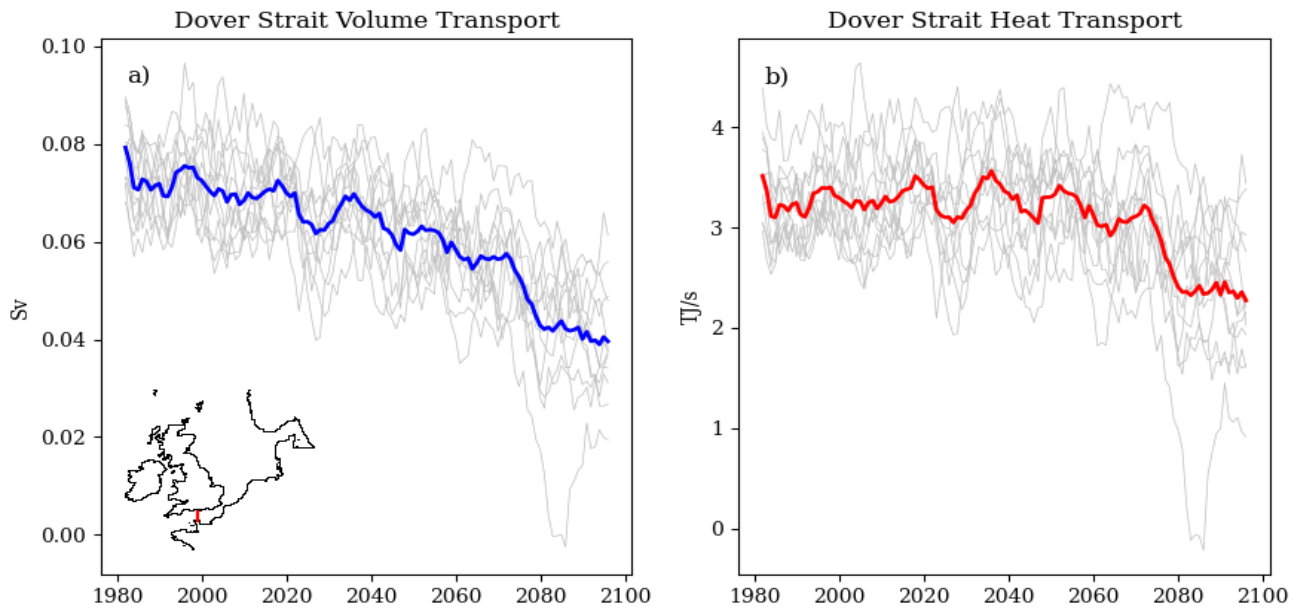

**Figure S7 a) Volume and b) heat transport (west to east) through the Dover Strait, for the ensemble members of the PPE (grey) and the Ensemble Mean (coloured).**



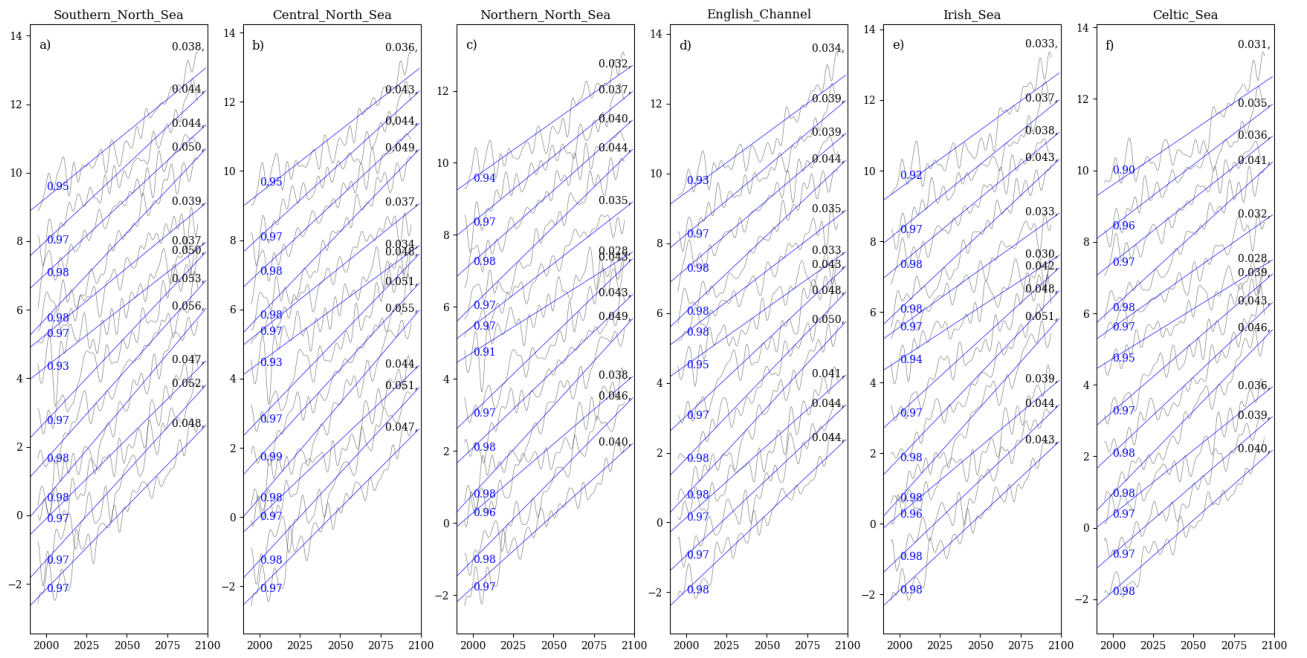

**Figure S8 Linear fits for (de-seasonalised) SST trends for each ensemble member (each line is offset) for selected inner shelf region (a-f – see region mask in Figure 10). On the left of each line is the correlation of the fit (blue), and the right is the gradient (black).**

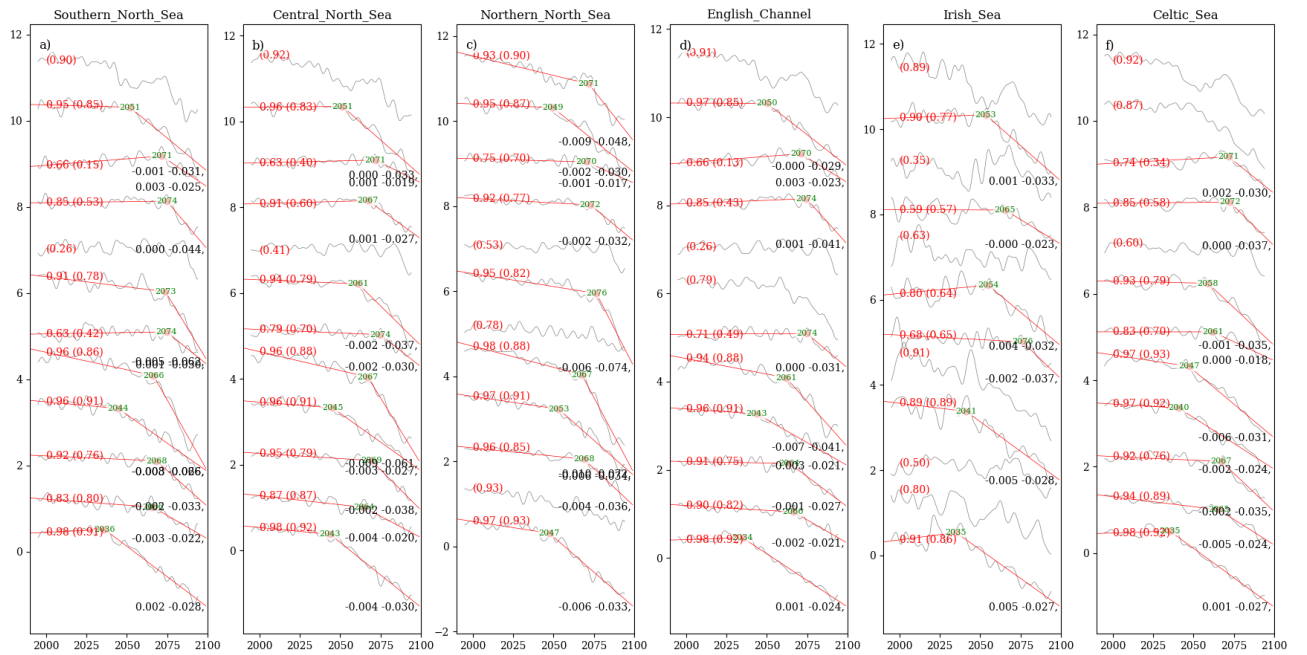

**Figure S9** Based on Figure S8 for (de-seasonalised) SSS, but rather than a single linear fit, two intersecting lines are fitted with a curve fitting program. Where the correlation is improved (compared to a single line), it is plotted in red. The correlation is given in red (and for the single linear fit in brackets). The slope of the first and second line is given in black. The year where the slope changes is given in green.

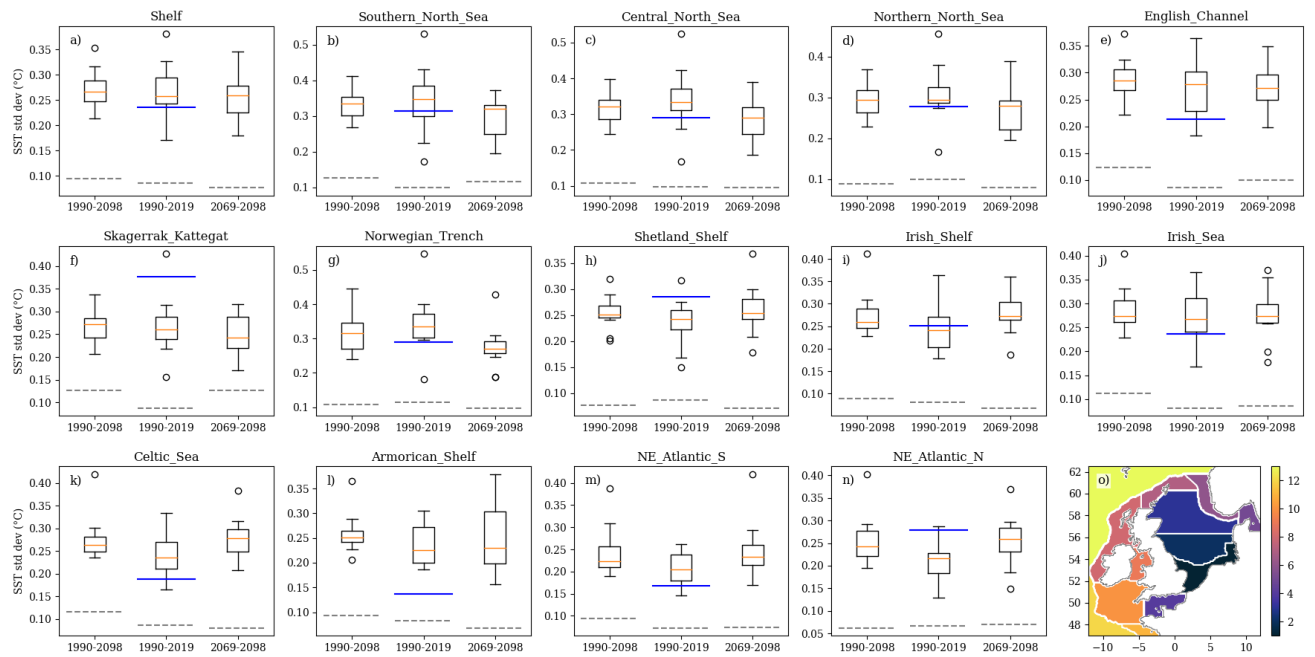

**Figure S10 SST (de-seasonalised and detrended) interannual variability. Low frequency (<5 yr) interannual variability for 1990-2008, 1990-2019 and 2069-2098. Each ensemble member annual mean time series is filtered with a 5-year low pass filter. The standard deviation is then calculated for the appropriate time-period, giving a distribution of 12 interannual variability estimates for the NWSPPE. These distributions are then plotted as box and whisker plots. The same method is applied to the NWSPPE ensemble mean, and the RAN (only for the 1990-2019 period), which are plotted as dotted grey and blue lines respectively. a-n) the NWS regions, and o) the NWS region mask.**

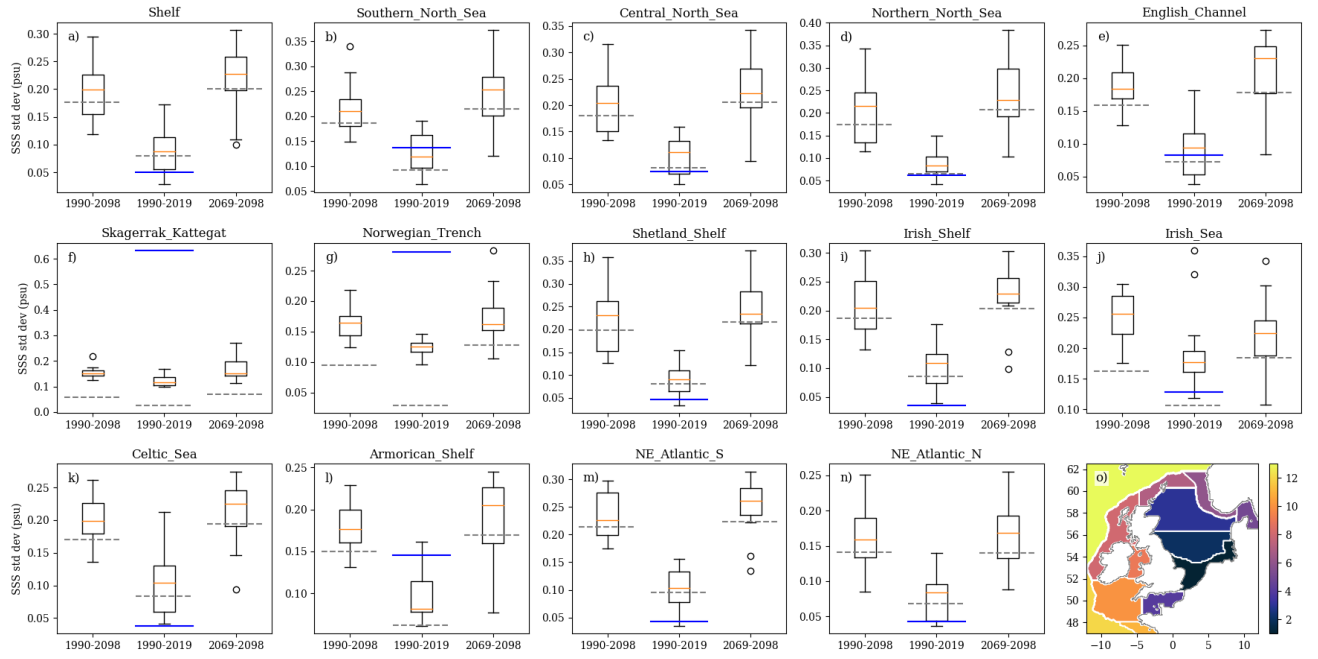

**Figure S11 SSS Low frequency variability, see Figure S10 for details.**

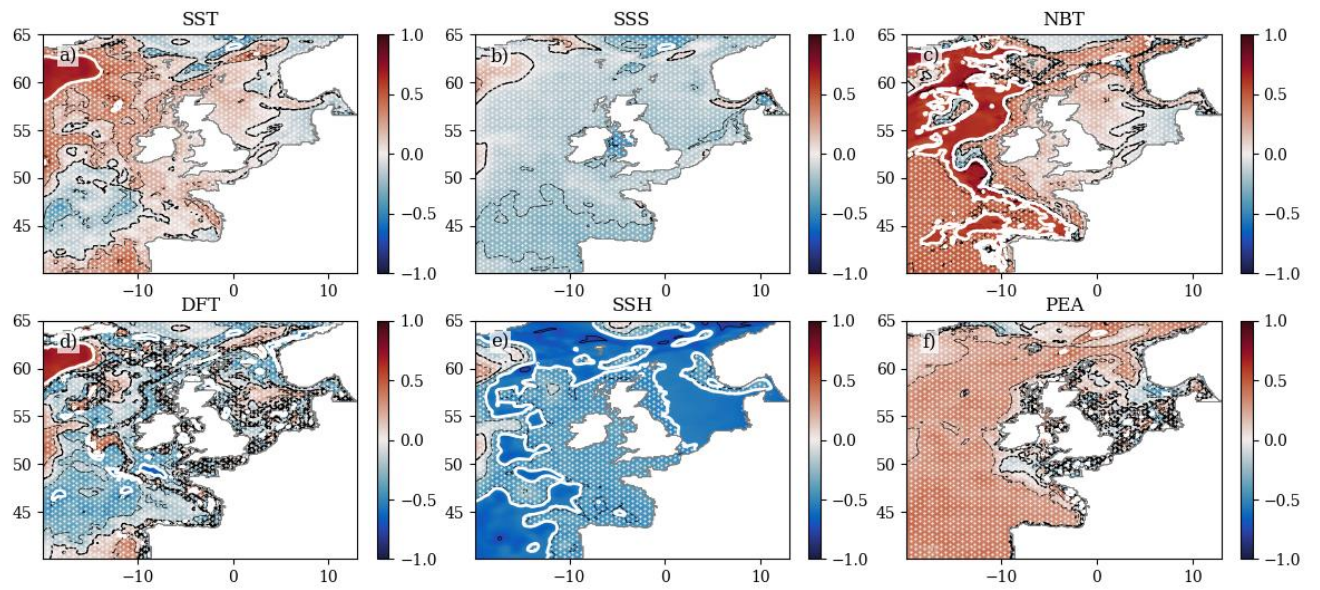

**Figure S12** Correlation between NWS winter change, and AMOC (at 26°N) change, both the difference between the 2069-2098 and 1990-2019 mean. a) Winter (DJF) SST change (2069-2098 mean minus 1990-2019 mean) for each of the 12 NWSPE ensemble members is correlated against the (annual mean) AMOC slow down (between the same periods) on a point-by-point basis. This is repeated for b) SSS; c) NBT; d) DFT; e) SSH and f) PEA. The (annual mean) AMOC slowdown is given in Table S9.

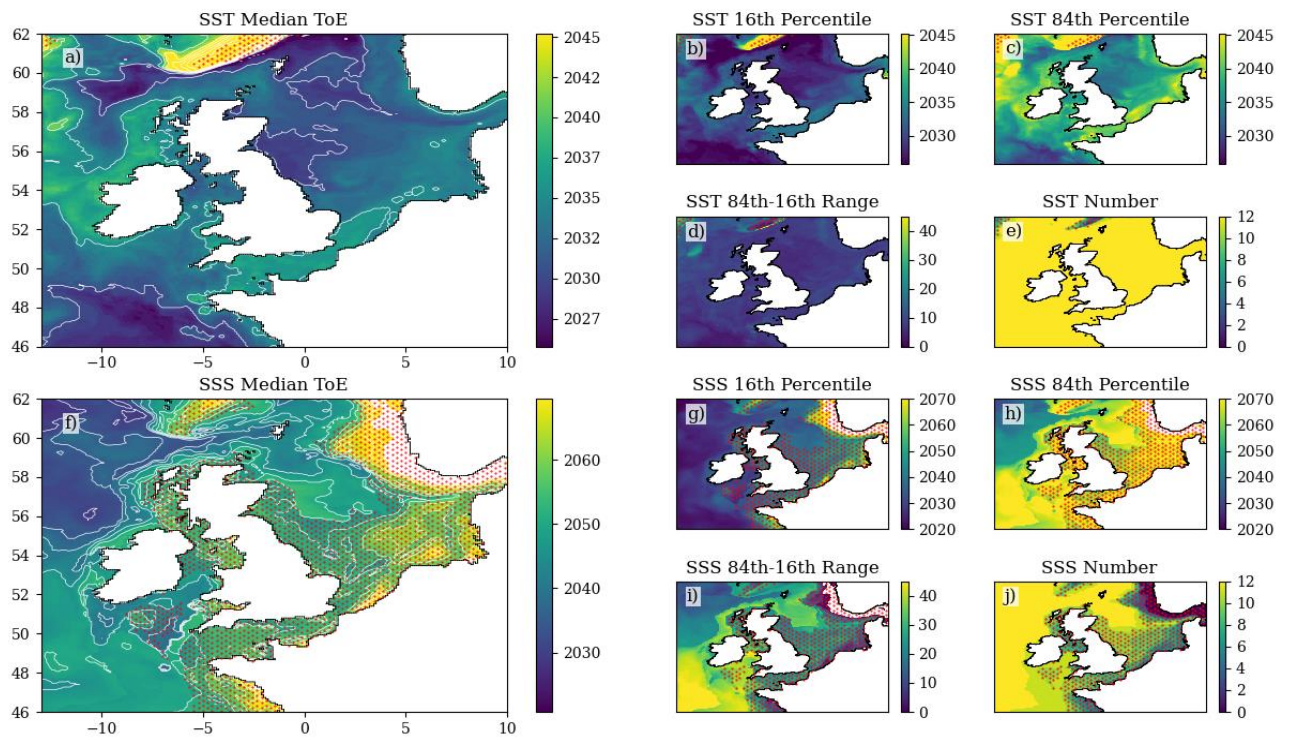

**Figure S13** Estimates of the Time of Emergence for SST (a-e) and SSS (f-j) following the Lyu et al., (2014) method. ToE is calculated for each ensemble member of the NWPPE, and the median range is given in a) and f) with the 16<sup>th</sup> (b, g) and 84<sup>th</sup> (c, h) percentile value, and their (16<sup>th</sup>-84<sup>th</sup> percentile) range (e, j). The number of ensemble members where the climate signal emerges is given in e) and j). Stippling shows where less than 84% of the ensemble (10 out of 12 members) show emergence.
